# Supplementary material for: Pyridoxamine Limits Cardiac Dysfunction in a Rat Model of Doxorubicin-Induced Cardiotoxicity
Source: MDPI journal article supplement (doi:10.3390/antiox13010112), 2024-01-17
Supplement: s1 [file s1]

## Supplementary Tables

Table S1: Primer sequences used for qPCR.

| Gene    | Forward primer           | Reverse primer            | Accession number |
|---------|--------------------------|---------------------------|------------------|
| RAGE    | TGGAAACTGAACACAGGAAGGA   | GGAGTGAACCATTGGGGAGG      | NM_053336.2      |
| IL-6    | TAGTCCTTCTACCCCAACTTCC   | TTGGTCCTTAGCCACTCCTTC     | NM_012589.2      |
| Bcl-2   | CTTCTCTCGTCGCTACCGTC     | GAAGAGTTCCTCCACCACCG      | NM_016993.2      |
| Bax     | ACACCTGAGCTGACCTTGGA     | TATCCACATCAGCAATCATCCTCT  | NM_017059.2      |
| Tp53    | CATGCCCTGTGCAGTTGTG      | AGCCAGGCCGTCACCATC        | NM_030989.3      |
| Casp3   | ACTACTGCCGGAGTCTGACT     | TAACCGGGTGCGGTAGAGTA      | NM_012922.2      |
| Col1a2  | GCCAAGAATGCATACAGCCG     | GACACCCCTTCTGCGTTGTA      | NM_053356.2      |
| Col3a1  | AACTGGAGCACGAGGTCTTG     | CGTTCCCCATTATGGCCACT      | NM_032085.1      |
| Tgfb1   | ACCGCAACAACGCAATCTATG    | GCACTGCTTCCCGAATGTCT      | NM_021578.2      |
| Lox     | AGCTGCCACCAACATTACCA     | GGGACTCAACCCCTGTGTG       | NM_001414003.1   |
| Nox2    | ATGCTGATCTTGCTGCCAGT     | AATGGCCGTGTGAAGTGCTA      | NM_023965.2      |
| Nox4    | TCATGGATCTTTGCCTGGAGGGTT | AGGTCTGTGGGAAATGAGCTTGGA  | NM_053524.1      |
| Sod1    | GCTTCTGTCGTCTCCTTGCT     | CACAACTGGTTCACCGCTTG      | NM_017050.1      |
| Sod2    | AGCTGCACCACAGCAAGCAC     | TCCACCACCCCTAGGGCTCA      | NM_017051.2      |
| Gpx1    | CAATCAGTTCGGACATCAGGAGAA | CTCACCATTACCTCGCACTT      | NM_030826.4      |
| Cat     | GACATCGGCACATGAATGGC     | GTGCAAGTCTTCTGCTCT        | NM_012520.2      |
| Nfkb1   | GACAACTATGAGGTCTCTGGGG   | CTGGATCACTTCAATGGCCTC     | NM_001276711.2   |
| Nrf2    | CAGCTACTCCCAGGTTGCCC     | ATAGCTCCTGCCAAACTTGCT     | NM_001399173.1   |
| TOP2β   | CCTGCATCAACTGGCAAACC     | CACAGGCTCTGCTTCTTCCA      | NM_001100858.2   |
| Nqo1    | AAGGGTGGGAAGAAGCGTCTG    | GATCTGGTTGTGCGGTGGAA      | NM_017000.3      |
| Pgk1    | AGCGGCTGTCAGAGAAAGAG     | CCTTCGACCTCTCGGATTTAG     | NM_053291.3      |
| Gucy1a1 | TGAACCAGCCCTATTTGCTC     | CTTGTTACACCAGCCTTC        | NM_017090.2      |
| Gucy1b1 | CGAGCAAAGTCCTCAACCTC     | AATGAGCCCTTTGCCTTTTT      | XM_039101764.1   |
| Hmox1   | AGGATTTGTCCGAGGCCTTG     | CTGGGTTCTGCTTGTTCGC       | NM_012580.2      |
| ZIP14   | ATCCAGAATCTTGGCCTCCT     | AGGCAGTCTGTGCCAGTTTT      | NM_001107275.1   |
| Fth1    | AAGTGCGCCAGAACTACCAC     | CTCAGCATGTTCCCTCTCTTC     | NM_012848.2      |
| mfrn1   | GAAGTGGTTCCGGCATCTT      | TTTCTCCTGCCTACCACCAC      | NM_001013996.1   |
| fpn1    | GGACTGGCTCAGCTTTCTTG     | CAGGCTGACGGAGATTATGG      | NM_133315.2      |
| Abcb8   | ACACTGATGCTGGCTGTTGT     | TGCTTGATAGCGTTCCTCCT      | NM_001007796.2   |
| Mcoln1  | CTCCAGACACGGAGACAACA     | ACCAGCCATTGACAAACTCC      | NM_001105903.1   |
| Nramp2  | AATGAGCAGGTGGTTGAGGT     | GCGACCATTTTAGGTTGAGG      | NM_001399169.1   |
| Tfr1    | GGATGAGACCAGAAGCCAAA     | TCAGTGCCAAAAACGACAGA      | NM_022712.1      |
| IL-1β   | ACCCAAGCACCTTCTTTTCCTT   | TGCAGCTGTCTAATGGGAACAT    | NM_031512.2      |
| CD68    | CACTTGGCTCTCTATTCCCT     | GCTGAGAATGTCCACTGTGCT     | NM_001031638.1   |
| CD86    | GTCAAGACATGTGTAACCTGCACC | ACGAGCTCACTCGGGCTTAT      | NM_020081.2      |
| CD163   | ATCACAGCATGGCACAGGT      | TCCAGATCATCCGTCTTCG       | NM_001107887.1   |
| CD206   | TCCCTCAATGGAACACACACTC   | TTAAAAATTGCCGTGAGTCCAAGAG | NM_001106123.2   |
| Tbp     | TGGGATTGTACCACAGCTCCA    | CTCATGATGACTGCAGCAAACC    | NM_001004198.1   |
| Rpl13A  | GGATCCCTCCACCCTATGACA    | CTGGTACTTCCACCCGACCTC     | NM_173340.2      |

Primer sequences are given in their 5'-3' orientation. Abcb8, ATP binding cassette subfamily B member 8. Bax, BCL2 associated X. Bcl2, B-cell lymphoma 2. Casp3, caspase 3. Cat, catalase. CD206, mannose receptor C-Type I. Col1a2, collagen type I alpha 2 chain. Col3a1, collagen type III alpha 1 chain. fpn1, ferroportin-1. Fth1, ferritin heavy chain 1. Gpx1, glutathione peroxidase 1. Gucy1a1, guanylate cyclase 1 soluble subunit alpha 1. Gucy1b1, guanylate cyclase 1 soluble subunit beta 1. Hmox1, heme oxygenase 1. IL-1β, interleukin 1 beta. IL-6, interleukin 6. Lox, lysyl oxidase. Mcoln1, mucopolipin 1. mfrn1, mitoferrin-1. Nfkb1, nuclear factor kappa B subunit 1. Nox2, NADPH oxidase 2. Nox4, NADPH oxidase 4. Nqo1, NAD(P)H quinone dehydrogenase 1. Nramp2, natural

resistance-associated macrophage protein 2. Nrf2, nuclear factor erythroid-2 related factor 2. Pgk1, phosphoglycerate kinase 1. RAGE, receptor for advanced glycation end products. Rpl13A, ribosomal protein L13A. Sod1, superoxide dismutase 1. Sod2, superoxide dismutase 2. Tbp, TATA box binding protein. Tfr1, transferrin receptor 1. Tgfb1, transforming growth factor beta 1. TOP2β, DNA topoisomerase II beta. Tp53, tumor protein p53. ZIP14, Zrt- and Irt-like protein 14.

**Table S2: LV echocardiographic parameters and plasma BNP at baseline.**

|                                           | CTRL          | DOX           | DOX+PM        | CTRL+PM       |
|-------------------------------------------|---------------|---------------|---------------|---------------|
| Conventional echocardiography             |               |               |               |               |
| LVEF (%)                                  | 86.7 ± 0.9    | 87.4 ± 1.2    | 85.6 ± 1.4    | 85.1 ± 1.6    |
| Longitudinal LVFS (%)                     | 24.6 ± 1.5    | 26.2 ± 0.8    | 25.6 ± 1.2    | 24.3 ± 1.2    |
| Radial LVFS (%)                           | 55.2 ± 1.8    | 54.1 ± 1.8    | 53.9 ± 1.8    | 52.7 ± 1.9    |
| LV cardiac index (ml/min/m <sup>2</sup> ) | 0.17 ± 0.01   | 0.18 ± 0.01   | 0.17 ± 0.01   | 0.17 ± 0.01   |
| LVESV/BSA (μl/cm <sup>2</sup> )           | 0.074 ± 0.007 | 0.075 ± 0.008 | 0.078 ± 0.008 | 0.094 ± 0.013 |
| LVEDV/BSA (μl/cm <sup>2</sup> )           | 0.553 ± 0.022 | 0.586 ± 0.019 | 0.546 ± 0.016 | 0.611 ± 0.027 |
| LVS index (μl/cm <sup>2</sup> )           | 0.48 ± 0.02   | 0.51 ± 0.02   | 0.47 ± 0.01   | 0.52 ± 0.02   |
| LV sphericity index                       | 0.20 ± 0.01   | 0.21 ± 0.01   | 0.18 ± 0.01   | 0.20 ± 0.01   |
| LVAW <sub>d</sub> (mm)                    | 1.88 ± 0.07   | 1.76 ± 0.04   | 1.71 ± 0.06   | 1.70 ± 0.04   |
| LVPW <sub>d</sub> (mm)                    | 1.81 ± 0.04   | 1.75 ± 0.06   | 1.83 ± 0.06   | 1.77 ± 0.07   |
| E/A                                       | 1.38 ± 0.05   | 1.52 ± 0.07   | 1.38 ± 0.04   | 1.37 ± 0.04   |
| E/E'                                      | -33.2 ± 2.1   | -28.7 ± 1.9   | -31.1 ± 1.5   | -29.6 ± 2.2   |
| HR (bpm)                                  | 351.9 ± 9.9   | 358.7 ± 10.8  | 360.7 ± 8.0   | 344.0 ± 8.6   |
| BSA (cm <sup>2</sup> )                    | 334.3 ± 7.8   | 337.6 ± 11.0  | 333.5 ± 8.6   | 329.8 ± 7.1   |
| Strain                                    |               |               |               |               |
| LVGLS (%)                                 | -40.7 ± 1.8   | -39.6 ± 1.9   | -35.9 ± 1.9   | -36.1 ± 2.1   |
| LVGCS (%)                                 | -40.2 ± 1.2   | -39.9 ± 0.9   | -37.0 ± 1.4   | -37.8 ± 1.2   |
| LV peak radial strain (%)                 | 105.3 ± 8.6   | 97.3 ± 4.1    | 84.3 ± 7.2    | 87.7 ± 5.9    |
| Plasma                                    |               |               |               |               |
| BNP (ng/ml)                               | 0.11 ± 0.02   | 0.11 ± 0.02   | 0.14 ± 0.02   | 0.15 ± 0.02   |

LV echocardiographic parameters and plasma BNP were measured in CTRL (N=14), DOX (N=15), DOX+PM (N=18), and CTRL+PM (N=14) animals at baseline. Random missing values are due to poor image quality. For plasma BNP: CTRL (N=12), DOX (N=15), DOX+PM (N=17), and CTRL+PM (N=13). Data are presented as mean ± SEM. A, mitral flow velocity in the late filling phase. BNP, brain natriuretic peptide. BSA, body surface area. DOX, doxorubicin. E, mitral flow velocity in the early filling phase. E', peak septal mitral annulus velocity in the early filling phase. HR, heart rate. LV, left ventricular. LVAW<sub>d</sub>, LV anterior wall in diastole. LVEF, LV ejection fraction. LVEDV, LV end-diastolic volume. LVESV, LV end-systolic volume. LVFS, LV fractional shortening. LVGCS, LV global circumferential strain. LVGLS, LV global longitudinal strain. LVPW<sub>d</sub>, LV posterior wall in diastole. LVS index, LV stroke volume. PM, pyridoxamine.

**Table S3: RV Hemodynamic parameters and lung wet-to-dry weight ratio at week 8.**

|                                  | CTRL            | DOX            | DOX+PM          | CTRL+PM         |
|----------------------------------|-----------------|----------------|-----------------|-----------------|
| Hemodynamic parameters           |                 |                |                 |                 |
| RVESP (mmHg)                     | 25.5 ± 1.5      | 22.8 ± 1.2     | 26.8 ± 1.7      | 29.1 ± 0.0      |
| RVEDP (mmHg)                     | 1.5 ± 1.9       | 3.1 ± 0.7      | 6.3 ± 1.2       | 4.4 ± 1.0       |
| RV dP/dt <sub>max</sub> (mmHg/s) | 1835.0 ± 90.8   | 1403.0 ± 139.9 | 1493.0 ± 126.5  | 1914.0 ± 254.5  |
| RV dP/dt <sub>min</sub> (mmHg/s) | -1475.0 ± 214.0 | -1276.0 ± 89.7 | -1222.0 ± 115.7 | -1739.0 ± 156.3 |
| RV contractility index (1/s)     | 146.0 ± 14.6    | 113.9 ± 11.7   | 96.3 ± 10.7     | 137.1 ± 24.3    |
| Organ weight                     |                 |                |                 |                 |
| Lung wet-to-dry weight ratio     | 5.03 ± 0.09     | 5.41 ± 0.16    | 5.27 ± 0.10     | 4.95 ± 0.09     |

RV hemodynamic parameters and lung wet-to-dry weight ratio measured in CTRL (N=3), DOX (N=7), DOX+PM (N=7), and CTRL+PM (N=3) animals at sacrifice. For lung wet-to-dry weight ratio: CTRL (N=14), DOX (N=13), DOX+PM (N=18), and CTRL+PM (N=14). Data are presented as mean ± SEM. DOX, doxorubicin. PM, pyridoxamine. RV, right ventricle. RV dP/dt<sub>max</sub>, maximum peak time derivative. RV dP/dt<sub>min</sub>, minimum peak time derivative. RVEDP, right ventricular end-diastolic pressure. RVESP, right ventricular end-systolic pressure.

### Supplementary Figures

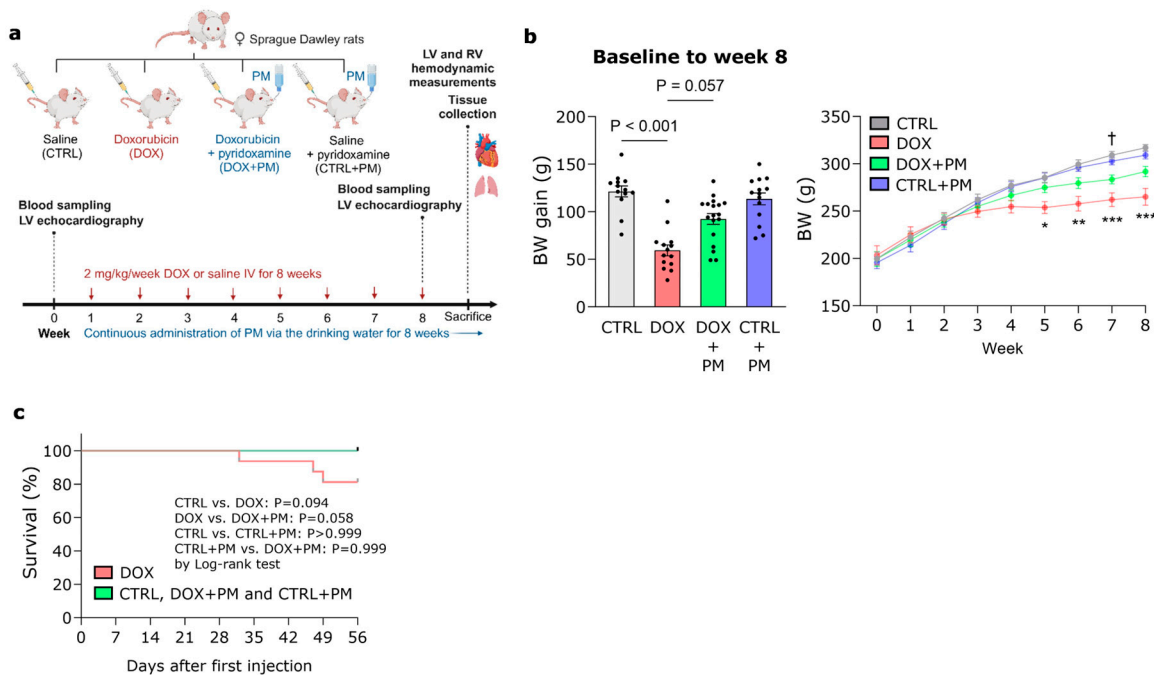

**Figure S1: Study design, BW, and survival. (a)** Parallel group design consisting of female Sprague Dawley rats randomly divided into four groups: CTRL (N=14), DOX (N=15), DOX+PM (N=18), and CTRL+PM (N=14). DOX (2 mg/kg) or 0.9% saline was administered weekly intravenously, denoted by black arrows. PM (1 g/L) was

administered *ad libitum* via drinking water from the first injection. BW was measured weekly. Echocardiography was performed at baseline and week 8, together with blood sampling. Invasive hemodynamic measurements of the LV and RV were performed at sacrifice. The heart and lungs were isolated and weighed. **(b)** BW gain from baseline to week 8 (left panel) and progression of bodyweight over time (right panel) for all groups for CTRL (N=13), DOX (N=14), DOX+PM (N=18), and CTRL+PM (N=14) animals. **(c)** Survival for all groups represented as a Kaplan-Meier plot. For B, right: \*P<0.05, \*\*P<0.01 and \*\*\*P<0.001 vs. CTRL and †P<0.05 DOX+PM vs. CTRL+PM. Figure A is created with BioRender.com. BW, body weight. DOX, doxorubicin. LV, left ventricular. PM, pyridoxamine. RV, right ventricular.

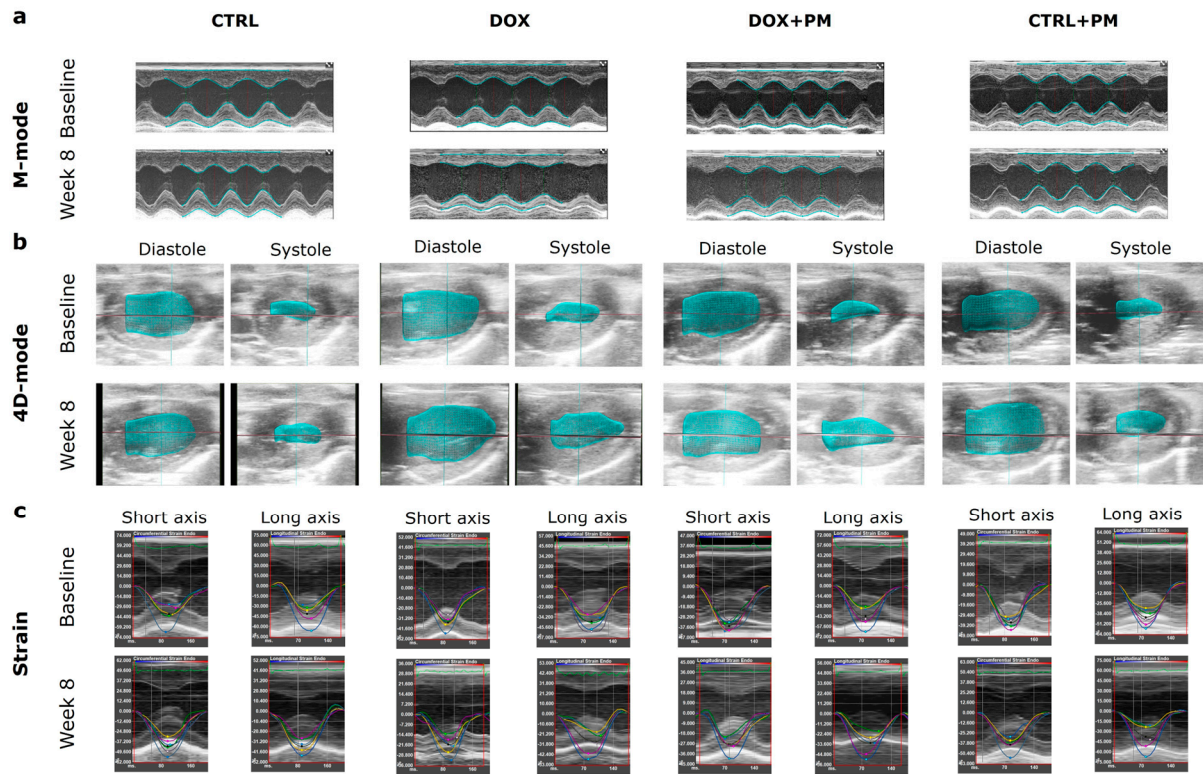

**Figure S2:** Representative echocardiographic images. **(a-c)** Representative pictures of M-mode obtained in parasternal short-axis view **(a)**, 4D reconstructed hearts during diastole and systole **(b)**, and circumferential and longitudinal strain in parasternal short-axis and long axis view **(c)** at baseline and week 8 of CTRL, DOX, DOX+PM, and CTRL+PM animals.

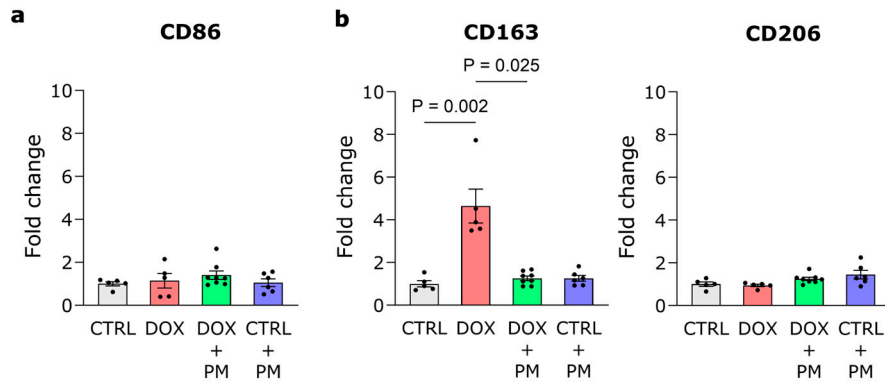

**Figure S3:** Expression of macrophage genes in cardiac LV tissue. **(a-b)** Quantification of the gene expression of the pro-inflammatory macrophage marker CD86 **(a)** and anti-inflammatory macrophage markers CD163 and CD206 **(b)** in LV tissue from CTRL (N=5), DOX (N=5), DOX+PM (N=8), and CTRL+PM (N=6) animals. LV, left ventricular.

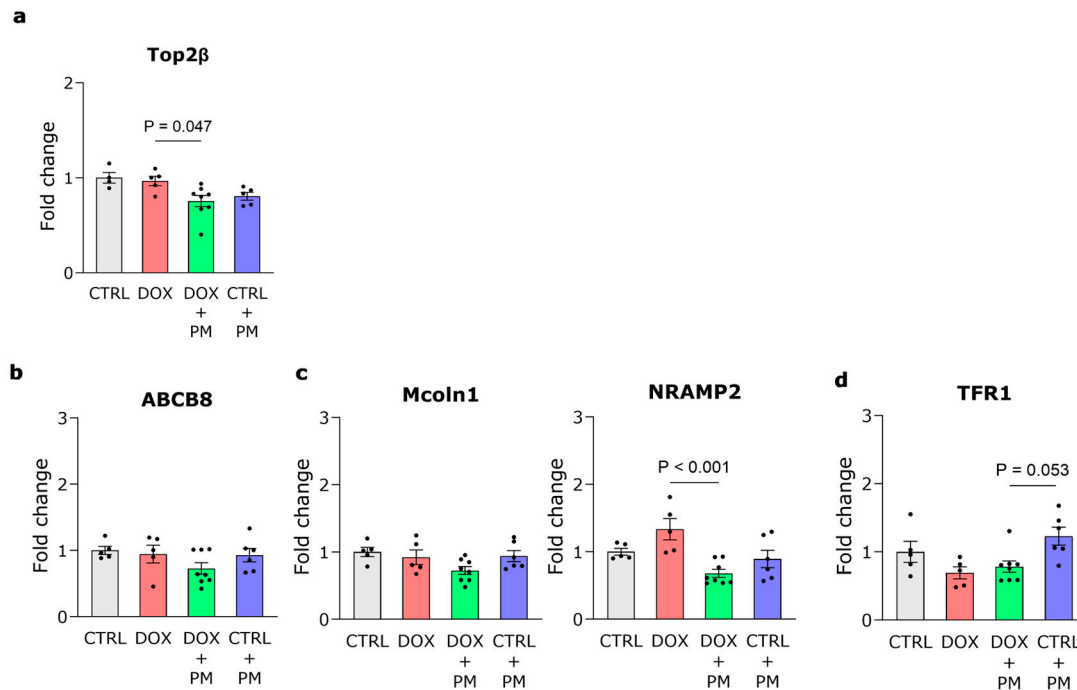

**Figure S4:** Expression of TOP2β gene and iron metabolism genes in cardiac LV tissue. **(a)** Quantification of DNA TOP2β gene expression in LV tissue from CTRL (N=4), DOX (N=5), DOX+PM (N=8), and CTRL+PM (N=5) animals. **(b-d)** Quantification of the expression of the mitochondrial iron exporter gene ABCB8 **(b)**, endosomal iron exporter genes Mcoln1 and NRAMP2 **(c)**, and transferrin receptor gene involved in iron import TFR1 **(d)** in LV tissue from CTRL (N=5), DOX (N=5), DOX+PM (N=8), and CTRL+PM (N=6) animals. DOX, doxorubicin. LV, left ventricular. PM, pyridoxamine.
